# Supplementary material for: Renewable 4-HIF/NaOH aerogel for efficient methylene blue removal via cation–π interaction induced electrostatic interaction
Source: Royal Society of Chemistry journal article supplement (doi:10.1039/c9ra04166d), 2019-01-01
Supplement: c9ra04166d1.pdf [file c9ra04166d1.pdf]

# *Supporting Information*

## **Renewable 4-HIF/NaOH aerogel for efficient methylene blue removal via cation- $\pi$ interaction induced electrostatic interaction**

Longfei Zhang, Li Yang\*, Yewei Xu, Guanjun Chang\*

State Key Laboratory of Environment-friendly Energy Materials & School of Material Science and Engineering, Southwest University of Science and Technology, Mianyang, 621010, P. R. China.

Corresponding Authors. E-mails: Li Yang, [yanglichem628@126.com](mailto:yanglichem628@126.com);

Guangjun Chang, [gjchang@mail.ustc.edu.cn](mailto:gjchang@mail.ustc.edu.cn).

### General remarks

For zeta potential measurements, 0.01 g 4-HIF aerogel powder was suspended in the 5 mL of deionized water. The Zetasizer nano potential analyzer (Zeta PAL) was used to measure the zeta potential ( $\xi$ ) at pH from 2 to 10. Each of the measurements was conducted at 25 °C and repeated 10 times. The 0.1 M solutions of sodium hydroxide (NaOH) and hydrochloric acid (HCl) solutions were used as a titration media to adjust the pH values.

0.45  $\mu\text{m}$  polypropylene syringe filter was a miniature-scale water purification device in which one slice of filter paper was fixed in its plastic shell. Mixing the aerogel powder with pure water in the syringe, upon press the syringe, water drop down and the aerogel powder was stuck on the filter paper easily. Then the polypropylene syringe filter equipped with aerogel was obtained and can be used to remove dye quickly and conveniently as we demonstrated in Fig. 3(a).

**Table S1.** BET Analysis of alkaline 4-HIF aerogel

| parameter    | value                           |
|--------------|---------------------------------|
| Surface area | 130 $\text{m}^2 \text{g}^{-1}$  |
| Pore volume  | 2.5 $\text{cm}^3 \text{g}^{-1}$ |
| Pore radius  | 46 nm                           |

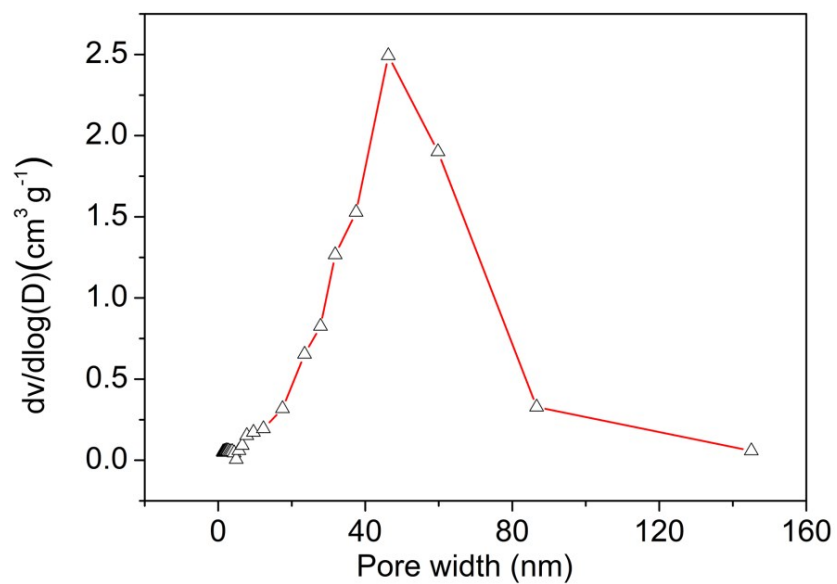

**Figure S1.** Pore size distribution curve of alkaline 4-HIF aerogel

**Table S2.** Weight ratio of elements of 4-HIF alkaline aerogel after adsorbing MB

| Element | Weight % | Atomic % |
|---------|----------|----------|
| C K     | 39.04    | 44.03    |
| N K     | 40.26    | 38.94    |
| O K     | 19.20    | 16.26    |
| Na K    | 0.80     | 0.47     |
| S K     | 0.70     | 0.29     |

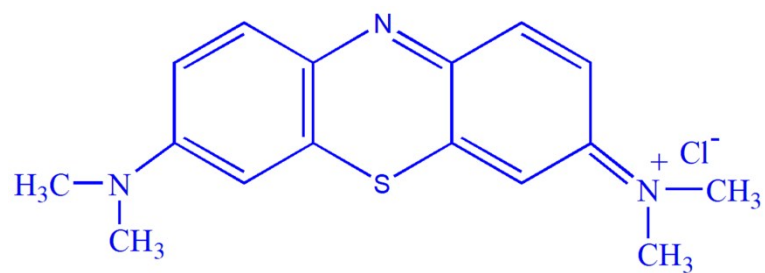

**Figure S2.** The molecular structures of methylene blue (MB)

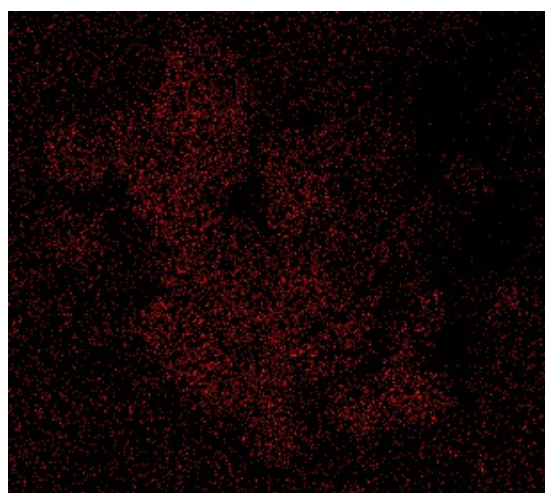

**Figure S3.** Elemental mapping of S in MB-4-HIF aerogel

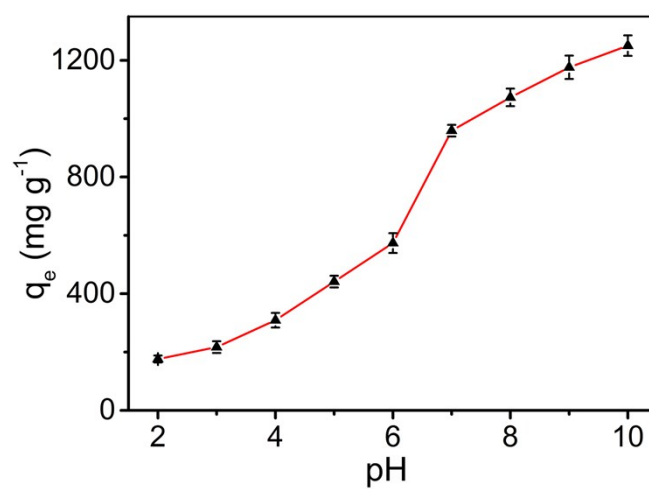

**Figure S4.** Effects of initial pH on the adsorption of MB onto the 4-HIF aerogel.

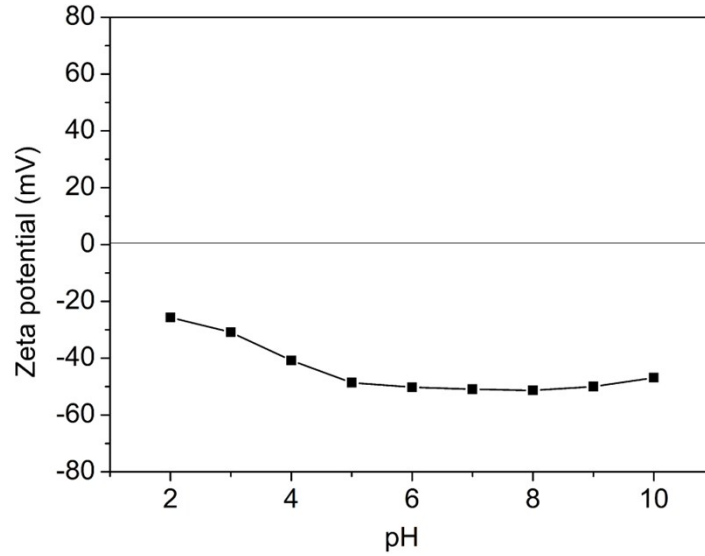

**Figure S5.** Zeta potentials of the alkaline 4-HIF aerogel at different pH solution.

**Table S3.** Kinetic parameters for the adsorption of MB

| Temperature<br>(K) | pseudo-first-order model          |                            |       | pseudo-second-order model   |                                               |       |
|--------------------|-----------------------------------|----------------------------|-------|-----------------------------|-----------------------------------------------|-------|
|                    | $q_{e,exp}$ (mg g <sup>-1</sup> ) | $K_1$ (min <sup>-1</sup> ) | $R^2$ | $q_e$ (mg g <sup>-1</sup> ) | $K_2$ (g mg <sup>-1</sup> min <sup>-1</sup> ) | $R^2$ |
| 303                | 961.4                             | 0.00675                    | 0.966 | 909.1                       | $6.71 \times 10^{-5}$                         | 0.994 |

**Table S4.** Parameters of Langmuir and Freundlich models and coefficients of determination ( $R^2$ ), for the adsorption of MB onto 4-HIF aerogel.

| Experimental $q_{max}$ (mg g <sup>-1</sup> ) | Freundlich |         |       | Langmuir                    |                             |       |
|----------------------------------------------|------------|---------|-------|-----------------------------|-----------------------------|-------|
|                                              | $K_f$      | 1/n     | $R^2$ | $q_m$ (mg g <sup>-1</sup> ) | $k_L$ (L mg <sup>-1</sup> ) | $R^2$ |
| 1012.6                                       | 686.6      | 0.08757 | 0.833 | 1016.9                      | 0.8939                      | 0.999 |

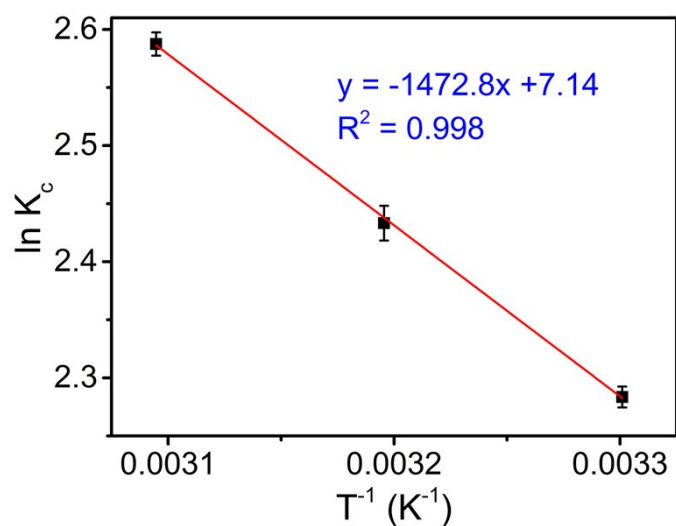

**Figure S6.** Van't Hoff graph for MB adsorption onto 4-HIF aerogel

**Table S5.** Thermodynamic parameters at different temperatures.

| T (K <sup>-1</sup> ) | q <sub>e</sub> (mg g <sup>-1</sup> ) | ΔG (kJ mol <sup>-1</sup> ) | ΔH (kJ mol <sup>-1</sup> ) | ΔS (J mol <sup>-1</sup> K <sup>-1</sup> ) |
|----------------------|--------------------------------------|----------------------------|----------------------------|-------------------------------------------|
| 303                  | 968.8                                | -5.757                     | 12.311                     | 59.609                                    |
| 313                  | 1019.1                               | -6.345                     | -                          | -                                         |
| 323                  | 1075.4                               | -6.951                     | -                          | -                                         |

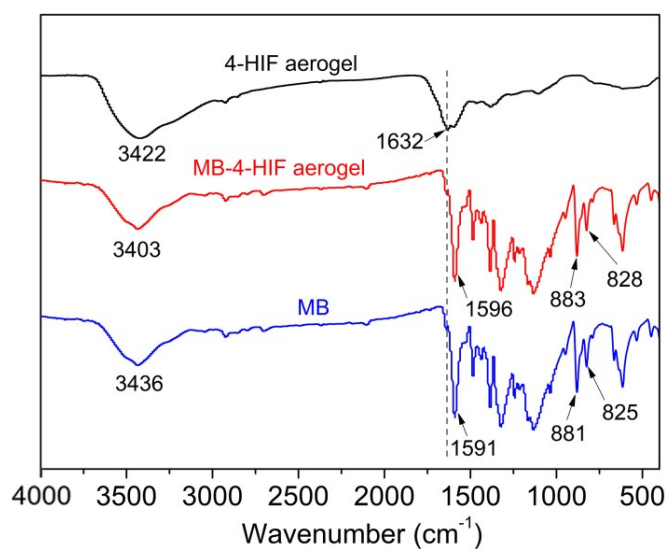

**Figure S7.** FT-IR spectra comparison of the 4-HIF aerogel, MB-4-HIF aerogel and MB.

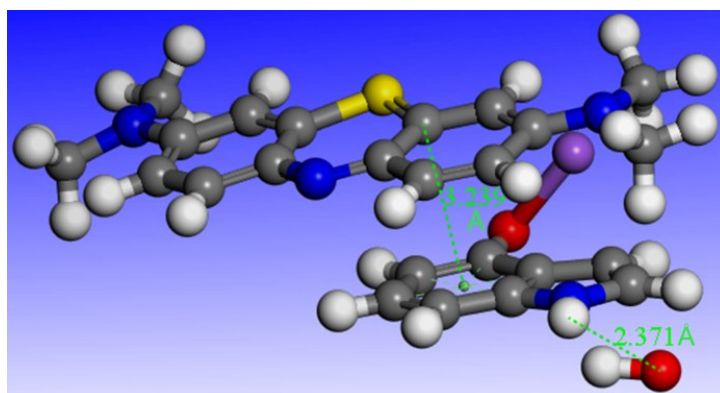

**Figure S8.** DFT simulation between MB and 4-HIF aerogel.

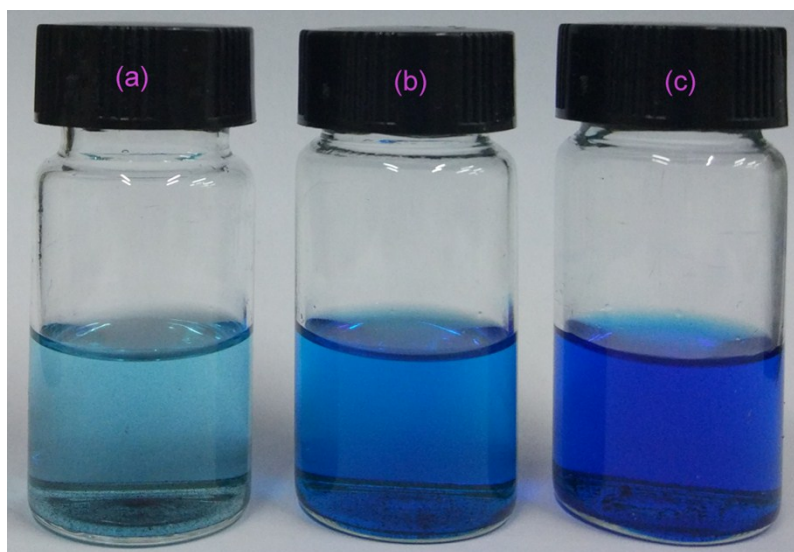

**Figure S9.** The photograph of desorbing MB-4-HIF aerogel by (a) ethanol, (b) 0.1 M HCl/ethanol at room temperature and (c) 0.1 M HCl/ethanol after heating at 50 °C (each vial 5 mg saturated MB-4-HIF aerogel powder was added).
